# Supplementary material for: Validation of newly derived polygenic risk scores for dementia in a prospective study of older individuals
Source: PubMed Central journal article supplement — Alzheimers Dement. Author manuscript; Available in PMC 2024 Jun 1. (PMC10640662; doi:10.1002/alz.13113), 2023-05-12
Supplement: NIHMS1912912-supplement-Supplementary_Material_1.pdf [file NIHMS1912912-supplement-Supplementary_Material_1.pdf]

# Validation of newly-derived polygenic risk scores for dementia in a prospective study of older individuals

## Supplementary Information

This file includes 4 tables and 1 figure.

**Table S1: Information of 83 variants used in the PRS-83SNP.**

| Variant ID  | CHR | Position <sup>a</sup> | Gene <sup>b</sup> | Minor/Major allele <sup>c</sup> | MAF <sup>d</sup> in ASPREE | Source in ASPREE |
|-------------|-----|-----------------------|-------------------|---------------------------------|----------------------------|------------------|
| rs141749679 | 1   | 109345810             | <i>SORT1</i>      | C/T                             | 0.003                      | Imputed          |
| rs679515    | 1   | 207577223             | <i>CR1</i>        | T/C                             | 0.179                      | Imputed          |
| rs72777026  | 2   | 9558882               | <i>ADAM17</i>     | G/A                             | 0.141                      | Imputed          |
| rs17020490  | 2   | 37304796              | <i>PRKD3</i>      | C/T                             | 0.139                      | Genotyped        |
| rs143080277 | 2   | 105749599             | <i>NCK2</i>       | C/T                             | 0.005                      | Imputed          |
| rs6733839   | 2   | 127135234             | <i>BIN1</i>       | T/C                             | 0.390                      | Genotyped        |
| rs139643391 | 2   | 202878716             | <i>WDR12</i>      | T/TC                            | 0.127                      | Imputed          |
| rs10933431  | 2   | 233117202             | <i>INPP5D</i>     | G/C                             | 0.227                      | Imputed          |
| rs16824536  | 3   | 155069722             | <i>MME</i>        | A/G                             | 0.056                      | Imputed          |
| rs61762319  | 3   | 155084189             | <i>MME</i>        | G/A                             | 0.027                      | Imputed          |
| rs3822030   | 4   | 993555                | <i>IDUA</i>       | G/T                             | 0.430                      | Imputed          |
| rs6846529   | 4   | 11023507              | <i>CLNK</i>       | C/T                             | 0.270                      | Imputed          |
| rs2245466   | 4   | 40197226              | <i>RHOH</i>       | G/C                             | 0.332                      | Imputed          |
| rs112403360 | 5   | 14724304              | <i>ANKH</i>       | A/T                             | 0.072                      | Imputed          |
| rs62374257  | 5   | 86927378              | <i>COX7C</i>      | C/T                             | 0.232                      | Imputed          |
| rs871269    | 5   | 151052827             | <i>TNIP1</i>      | T/C                             | 0.326                      | Imputed          |
| rs113706587 | 5   | 180201150             | <i>RASGEF1C</i>   | A/G                             | 0.102                      | Imputed          |
| rs6605556   | 6   | 32615322              | <i>HLA-DQA1</i>   | G/A                             | 0.187                      | Imputed          |
| rs10947943  | 6   | 41036354              | <i>UNC5CL</i>     | A/G                             | 0.152                      | Imputed          |
| rs143332484 | 6   | 41161469              | <i>TREM2</i>      | T/C                             | 0.010                      | Imputed          |
| rs75932628  | 6   | 41161514              | <i>TREM2</i>      | T/C                             | 0.003                      | Imputed          |
| rs60755019  | 6   | 41181270              | <i>TREML2</i>     | G/A                             | 0.001                      | Imputed          |
| rs7767350   | 6   | 47517390              | <i>CD2AP</i>      | T/C                             | 0.269                      | Imputed          |
| rs785129    | 6   | 114291731             | <i>HS3ST5</i>     | T/C                             | 0.341                      | Imputed          |
| rs6943429   | 7   | 7817263               | <i>UMAD1</i>      | T/C                             | 0.412                      | Imputed          |
| rs10952097  | 7   | 8204382               | <i>ICA1</i>       | T/C                             | 0.105                      | Imputed          |
| rs13237518  | 7   | 12229967              | <i>TMEM106B</i>   | A/C                             | 0.414                      | Imputed          |
| rs1160871   | 7   | 28129126              | <i>JAZF1</i>      | G/GTCTT                         | 0.208                      | Imputed          |
| rs6966331   | 7   | 37844191              | <i>EPDR1</i>      | T/C                             | 0.335                      | Imputed          |
| rs76928645  | 7   | 54873635              | <i>SEC61G</i>     | T/C                             | 0.104                      | Imputed          |

|             |    |           |                         |        |       |           |
|-------------|----|-----------|-------------------------|--------|-------|-----------|
| rs7384878   | 7  | 100334426 | <i>SPDYE3</i>           | C/T    | 0.323 | Imputed   |
| rs11771145  | 7  | 143413669 | <i>EPHA1</i>            | A/G    | 0.353 | Genotyped |
| rs1065712   | 8  | 11844613  | <i>CTSB</i>             | C/G    | 0.052 | Imputed   |
| rs73223431  | 8  | 27362470  | <i>PTK2B</i>            | T/C    | 0.365 | Imputed   |
| rs11787077  | 8  | 27607795  | <i>CLU</i>              | T/C    | 0.401 | Imputed   |
| rs34173062  | 8  | 144103704 | <i>SHARPIN</i>          | A/G    | 0.079 | Genotyped |
| rs1800978   | 9  | 104903697 | <i>ABCA1</i>            | G/C    | 0.128 | Imputed   |
| rs7912495   | 10 | 11676714  | <i>USP6NL</i>           | G/A    | 0.449 | Imputed   |
| rs7068231   | 10 | 60025170  | <i>ANK3</i>             | T/G    | 0.402 | Imputed   |
| rs6586028   | 10 | 80494228  | <i>TSPAN14</i>          | C/T    | 0.201 | Imputed   |
| rs6584063   | 10 | 96266650  | <i>BLNK</i>             | G/A    | 0.041 | Imputed   |
| rs7908662   | 10 | 122413396 | <i>PLEKHA1</i>          | G/A    | 0.470 | Imputed   |
| rs10437655  | 11 | 47370397  | <i>SPI1</i>             | A/G    | 0.386 | Imputed   |
| rs1582763   | 11 | 60254475  | <i>MS4A4A</i>           | A/G    | 0.378 | Genotyped |
| rs3851179   | 11 | 86157598  | <i>EED</i>              | T/C    | 0.372 | Genotyped |
| rs74685827  | 11 | 121482368 | <i>SORL1</i>            | G/T    | 0.019 | Genotyped |
| rs11218343  | 11 | 121564878 | <i>SORL1</i>            | C/T    | 0.037 | Genotyped |
| rs6489896   | 12 | 113281983 | <i>TPCN1</i>            | C/T    | 0.071 | Imputed   |
| rs17125924  | 14 | 52924962  | <i>FERMT2</i>           | G/A    | 0.094 | Imputed   |
| rs7401792   | 14 | 92464917  | <i>SLC24A4</i>          | G/A    | 0.354 | Imputed   |
| rs12590654  | 14 | 92472511  | <i>SLC24A4</i>          | A/G    | 0.343 | Imputed   |
| rs7157106   | 14 | 105761758 | <i>IGH gene cluster</i> | A/G    | 0.331 | Imputed   |
| rs10131280  | 14 | 106665591 | <i>IGH gene cluster</i> | A/G    | 0.125 | Imputed   |
| rs8025980   | 15 | 50701814  | <i>SPPL2A</i>           | G/A    | 0.341 | Imputed   |
| rs602602    | 15 | 58764824  | <i>MINDY2</i>           | A/T    | 0.293 | Imputed   |
| rs117618017 | 15 | 63277703  | <i>APH1B</i>            | T/C    | 0.136 | Genotyped |
| rs3848143   | 15 | 64131307  | <i>SNX1</i>             | G/A    | 0.208 | Imputed   |
| rs12592898  | 15 | 78936857  | <i>CTSH</i>             | A/G    | 0.128 | Imputed   |
| rs1140239   | 16 | 30010081  | <i>DOC2A</i>            | T/C    | 0.405 | Imputed   |
| rs889555    | 16 | 31111250  | <i>BCKDK</i>            | T/C    | 0.286 | Imputed   |
| rs4985556   | 16 | 70660097  | <i>IL34</i>             | A/C    | 0.120 | Genotyped |
| rs450674    | 16 | 79574511  | <i>MAF</i>              | C/T    | 0.392 | Imputed   |
| rs12446759  | 16 | 81739398  | <i>PLCG2</i>            | G/A    | 0.399 | Genotyped |
| rs72824905  | 16 | 81908423  | <i>PLCG2</i>            | G/C    | 0.009 | Imputed   |
| rs16941239  | 16 | 86420604  | <i>FOXF1</i>            | A/T    | 0.021 | Imputed   |
| rs56407236  | 16 | 90103687  | <i>PRDM7</i>            | A/G    | 0.070 | Genotyped |
| rs35048651  | 17 | 1728046   | <i>WDR81</i>            | T/TGAG | 0.218 | Imputed   |
| rs7225151   | 17 | 5233752   | <i>SCIMP</i>            | A/G    | 0.117 | Genotyped |
| rs2242595   | 17 | 18156140  | <i>MYO15A</i>           | A/G    | 0.124 | Genotyped |
| rs5848      | 17 | 44352876  | <i>GRN</i>              | T/C    | 0.278 | Imputed   |
| rs199515    | 17 | 46779275  | <i>WNT3</i>             | G/C    | 0.217 | Genotyped |
| rs616338    | 17 | 49219935  | <i>ABI3</i>             | T/C    | 0.008 | Imputed   |
| rs2526377   | 17 | 58332680  | <i>TSPOAP1</i>          | G/A    | 0.436 | Imputed   |

|             |    |          |                 |      |       |         |
|-------------|----|----------|-----------------|------|-------|---------|
| rs4277405   | 17 | 63471557 | <i>ACE</i>      | C/T  | 0.381 | Imputed |
| rs12151021  | 19 | 1050875  | <i>ABCA7</i>    | A/G  | 0.324 | Imputed |
| rs149080927 | 19 | 1854254  | <i>KLF16</i>    | G/GC | 0.469 | Imputed |
| rs9304690   | 19 | 49950060 | <i>SIGLEC11</i> | T/C  | 0.240 | Imputed |
| rs587709    | 19 | 54267597 | <i>LILRB2</i>   | C/T  | 0.276 | Imputed |
| rs1358782   | 20 | 413334   | <i>RBCK1</i>    | A/G  | 0.234 | Imputed |
| rs6014724   | 20 | 56423488 | <i>CASS4</i>    | G/A  | 0.083 | Imputed |
| rs6742      | 20 | 63743088 | <i>SLC2A4RG</i> | T/C  | 0.213 | Imputed |
| rs2154481   | 21 | 26101558 | <i>APP</i>      | C/T  | 0.483 | Imputed |
| rs2830489   | 21 | 26775872 | <i>ADAMTS1</i>  | T/C  | 0.275 | Imputed |

<sup>a</sup> GRCh38 assembly.

<sup>b</sup> Nearest protein coding gene according to Gencode release 33.

<sup>c</sup> Effect size (beta) of risk alleles can be found in Bellenguez *et al.* (2022).

<sup>d</sup> Minor allele frequency.

**Table S2. Correlations between four dementia-related PRS based on the ASPREE participants included in this genetic study.**

| Dementia-related polygenic risk score | PRS-83SNP | PRS-SBayesR | PRS-CS | PRS-23SNP |
|---------------------------------------|-----------|-------------|--------|-----------|
| PRS-83SNP                             |           |             |        |           |
| PRS-SBayesR                           | 0.54      |             |        |           |
| PRS-CS                                | 0.39      | 0.85        |        |           |
| PRS-23SNP                             | 0.56      | 0.42        | 0.32   |           |

**Table S3. Association of four dementia-related polygenic risk scores (as a continuous variable, per SD) with risk of incident dementia, adjusted for the competing risk of death.**

| Dementia-related polygenic risk score | Model 1          |          | Model 2          |          | Model 3          |          |
|---------------------------------------|------------------|----------|------------------|----------|------------------|----------|
|                                       | HR (95% CI)      | P value  | HR (95% CI)      | P value  | HR (95% CI)      | P value  |
| PRS-83SNP                             | 1.34 (1.23-1.46) | 1.49E-11 | 1.36 (1.25-1.48) | 2.28E-12 | 1.34 (1.23-1.46) | 4.73E-11 |
| PRS-SBayesR                           | 1.39 (1.27-1.51) | 9.05E-13 | 1.37 (1.25-1.50) | 8.63E-12 | 1.37 (1.25-1.50) | 2.85E-11 |
| PRS-CS                                | 1.43 (1.31-1.57) | 1.88E-14 | 1.42 (1.29-1.56) | 1.50E-13 | 1.42 (1.30-1.56) | 1.39E-13 |
| PRS-23SNP                             | 1.11 (1.01-1.22) | 0.03     | 1.12 (1.02-1.23) | 0.02     | 1.12 (1.02-1.23) | 0.02     |

Note: Fine-Gray subdistribution hazard model accounting for a competing risk of mortality was used to estimate the hazard ratio (HR) of the PRS per standard deviation, with 95% confidence intervals (CI). Model 1 was adjusted for age at recruitment, sex and first 20 genetic PCs. Model 2 was additionally adjusted for the number of *APOE*- $\epsilon$ 4 and *APOE*- $\epsilon$ 2 alleles. Model 3 was further adjusted for baseline smoking status, alcohol drinking status, BMI, living status, years of education, CES-D-10, diabetes status, systolic blood pressure, diastolic blood pressure, dyslipidemia and dementia family history.

**Table S4. P-values in associations between PRS (a continuous variable)-by-covariate interaction and incident dementia using a fully adjusted model (Model 3). Marginally significant signals (P<0.05, bold) were detected for some interactions.**

| Covariate                                | P for PRS-by-covariate interaction |              |             |             |
|------------------------------------------|------------------------------------|--------------|-------------|-------------|
|                                          | PRS-83SNP                          | PRS-SBayesR  | PRS-CS      | PRS-23SNP   |
| Age at recruitment                       | 0.22                               | 0.71         | 0.25        | 0.38        |
| Sex                                      | 0.88                               | 0.83         | 0.96        | 0.87        |
| Smoking status <sup>a</sup>              | 0.73                               | 0.10         | 0.05        | 0.09        |
|                                          | 0.52                               | 0.17         | 0.09        | 0.11        |
| Alcohol drinking status <sup>b</sup>     | 0.74                               | 0.41         | 0.52        | 0.85        |
|                                          | <b>0.02</b>                        | <b>0.001</b> | <b>0.01</b> | <b>0.02</b> |
| Years of education                       | 0.22                               | 0.50         | 0.35        | 0.30        |
| Living status                            | 0.45                               | 0.52         | 0.97        | 0.27        |
| CES-D-10                                 | 0.26                               | 0.07         | 0.06        | 0.34        |
| BMI                                      | 0.49                               | 0.37         | 0.68        | 0.13        |
| Systolic blood pressure                  | 0.67                               | 0.60         | 0.64        | 0.60        |
| Diastolic blood pressure                 | 0.40                               | 0.19         | 0.44        | 0.53        |
| Diabetes status                          | 0.12                               | 0.05         | 0.16        | 0.07        |
| Dyslipidemia                             | 0.41                               | 0.43         | 0.12        | 0.38        |
| Dementia family history                  | 0.86                               | 0.73         | 0.38        | 0.52        |
| the number of <i>APOE</i> - $\epsilon$ 2 | 0.61                               | 0.42         | 0.34        | 0.92        |
| the number of <i>APOE</i> - $\epsilon$ 4 | 0.14                               | <b>0.004</b> | <b>0.01</b> | 0.97        |

<sup>a</sup> Using “Current smoking” as a reference, the two P-values were derived by comparing with “Former smoking” and “Never smoking”, respectively.

<sup>b</sup> Using “Current alcohol use” as a reference, the two P-values were derived by comparing with “Former alcohol use” and “Never alcohol use”, respectively.

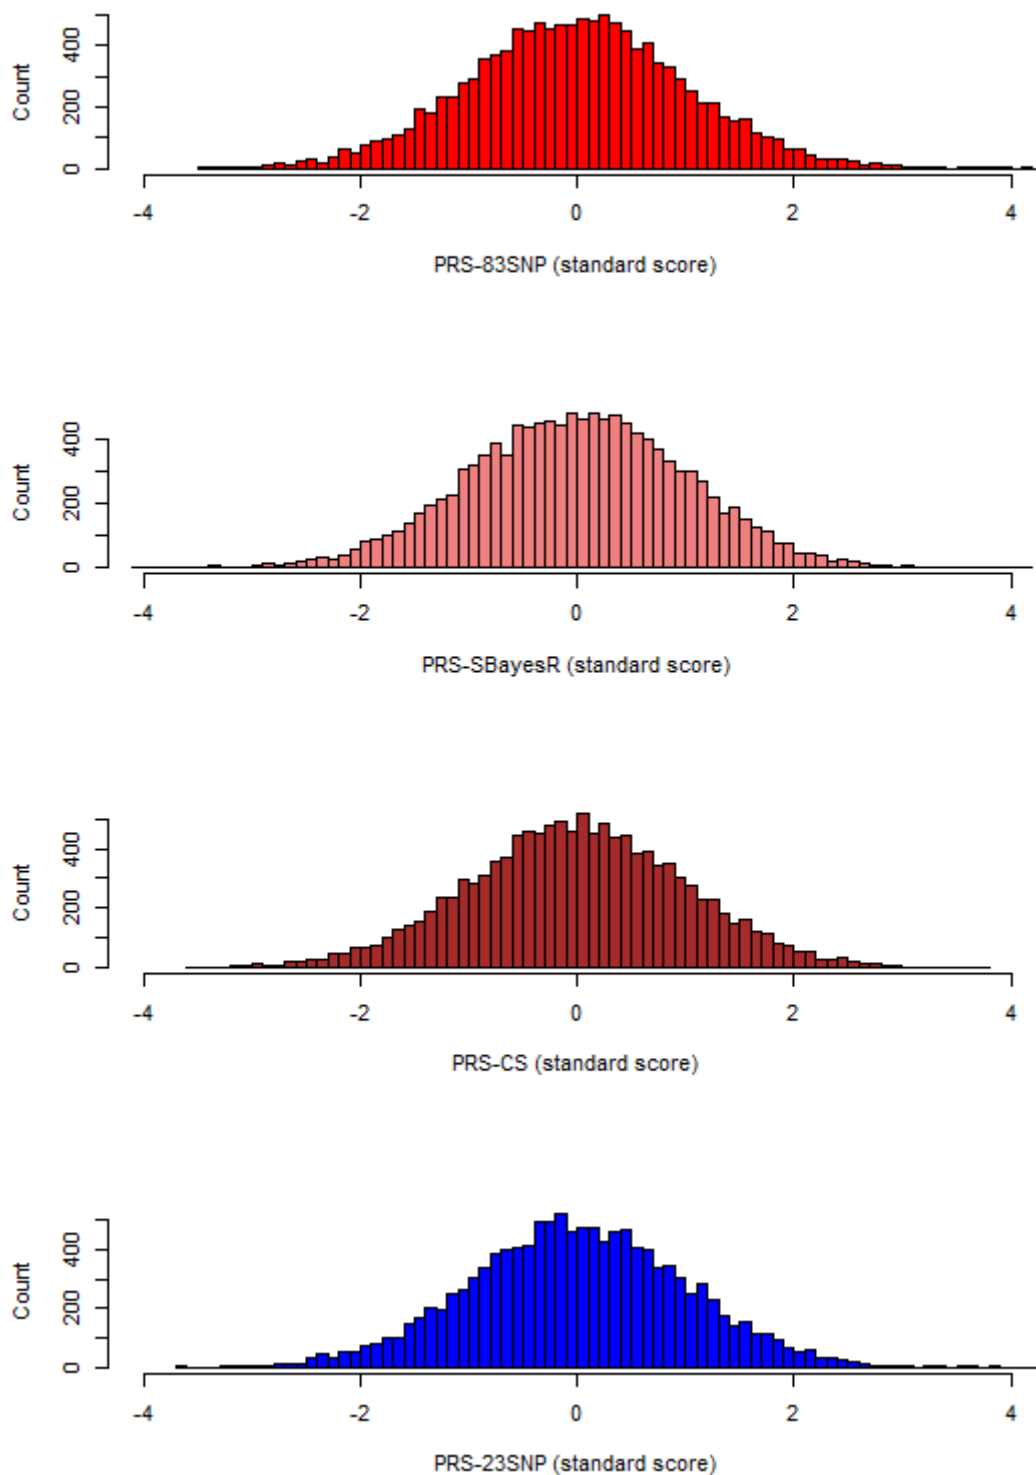

**Figure S1: Four PRS distributions of the 12,031 ASPREE participants included in this study.** The scores were standardised to a mean of 0 and a variance of 1. These distributions are all approximately Gaussian (Kolmogorov-Smirnov test P value = 0.11 for PRS-83SNP, 0.85 for PRS-SBayesR, 0.75 for PRS-CS, and 0.69 for PRS-23SNP).
